# Supplementary material for: Correction: Proliferation of Murine Midbrain Neural Stem Cells Depends upon an Endogenous Sonic Hedgehog (Shh) Source
Source: PubMed Central journal article supplement (PMC7514037; doi:10.1371/journal.pone.0239995), 2020-09-24

# EXPERIMENTAL SERIES 1 SDS PAGE 10%

- Lane 1: control 7 days of treatment in differentiation conditions (without growth factors)
- Lane 2: control 7 days of treatment in differentiation conditions
- Lane 3: Shh 7 days of treatment in differentiation conditions
- Lane 4: Shh 7 days of treatment in differentiation conditions
- Lane 5: control 14 days of treatment in differentiation conditions
- Lane 6: control 14 days of treatment in differentiation conditions
- Lane 7: Shh 14 days of treatment in differentiation conditions
- Lane 8: Shh 14 days of treatment in differentiation conditions
- Lane 9: Neurospheres control

NESTIN

1 2 3 4 5 6 7 8 9

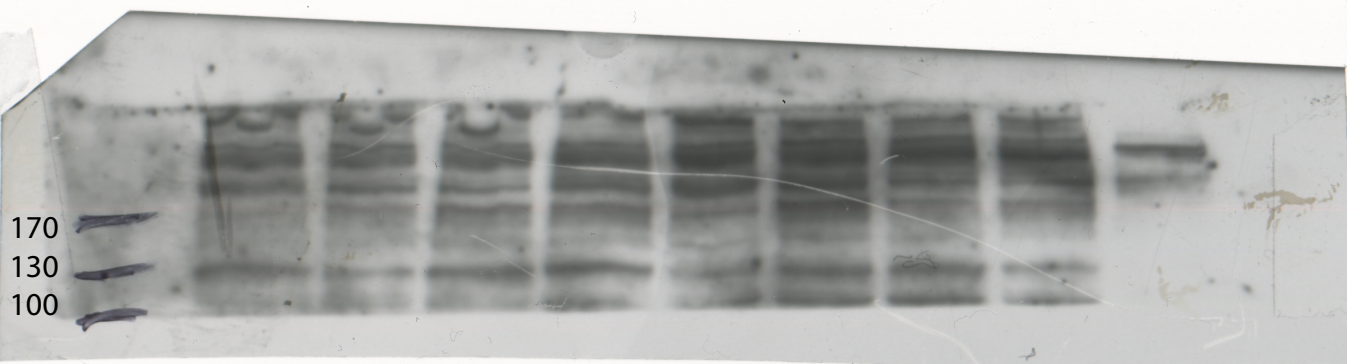

TUBULIN

55 KDa

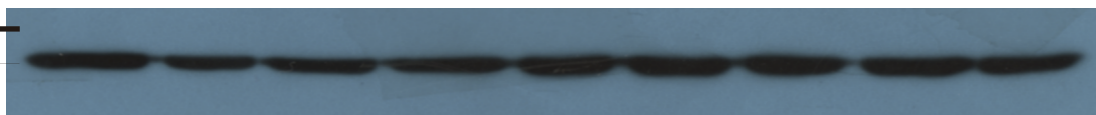

CYCLIN D1

40 KDa

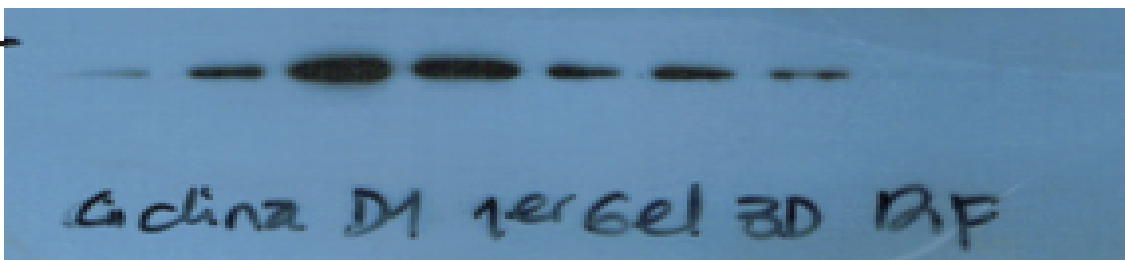

BLBP

25 KDa

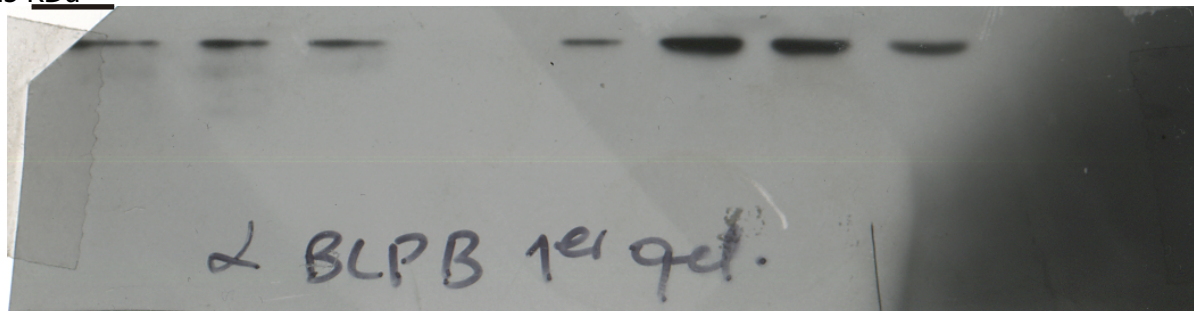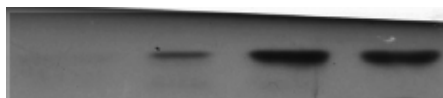

Supplement: pone.0239995.s002.pdf [file pone.0239995.s002.pdf]
